# Supplementary material for: Role of solvophilic moieties of gelators in the thermal stability of organogels
Source: Royal Society of Chemistry journal article supplement (doi:10.1039/d2cp05136b), 2023-01-01
Supplement: d2cp05136b1.pdf [file d2cp05136b1.pdf]

Electronic Supplementary Information for

**Role of solvophilic moieties of gelators in the thermal stability of organogels**

Katsura Nishiyama,<sup>\*a</sup> Kei Ezaki,<sup>a</sup> Kyohei Tsukada,<sup>a</sup> Masaru Kinoshita,<sup>b</sup> Keisuke  
Watanabe,<sup>c</sup> and Yukiteru Katsumoto<sup>d</sup>

<sup>a</sup>Department of Environmental Technology, Meijo University, Tempaku, Nagoya 468–8502,  
Japan.

<sup>b</sup>Faculty of Education, Shimane University, Matsue 690–8504, Japan.

<sup>c</sup>Department of Chemistry, Faculty of Science, Fukuoka University, Fukuoka 814–0180, Japan.

\*Corresponding author: knis@meijo-u.ac.jp

## Table of contents

§S1. Backgrounds and detailed handling of Hansen solubility parameters (HSPs)

§S2. Materials and thermal measurements

Table S1.  $T_{\text{drop}}$  values of organogels depending on solvent

Table S2. Hansen solubility parameters of solvents and gelator

Fig S1. Equipment and diagrams of  $T_{\text{drop}}$  and DTA measurements

§S3. Data analyses with HSPs

§S4.  $k$ -Fold cross validation for plots in Analyses I–V

Table S3. Solvent choices for 5-Fold cross validation for linear fitting drawn in Fig. 1

Fig. S2. Results for 5-fold cross validation for the  $T_{\text{drop}}—R_a$  relation

§S5. Schematic diagram of organogel breakdown with temperature

Fig. S3 A schematic diagram of gel–sol transition with heat, suggested by small angle x-ray scattering

Table S4. Details of Phases a–d proposed in Fig. S2

## §S1. Backgrounds and detailed handling of Hansen solubility parameters (HSPs)

HSPs have been initially proposed for predicting the “solubility” of two chemicals based upon the similarity of their interaction energy.<sup>1, 2</sup> From a thermodynamic point of view, a cohesive interaction of between molecules can be expressed as the energy density. The quantity can be estimated using a macroscopic parameter such as the vaporization enthalpy per molar volume. The first solubility parameter proposed by Hildebrand<sup>3, 4</sup> is represented by a single component with the square root of the energy density ( $\delta$ ), and later Hansen divided it into three components: dispersion ( $\delta_D$ ), polar interactions or the Coulomb part ( $\delta_P$ ), and hydrogen bond contributions ( $\delta_H$ ). After assigning these three parameters to each solvent, we can plot them in the 3-dimensional cartesian coordinates, resulting in the “Hansen space”. By based on the “like dissolves like” concept, the distance in the HSP space ( $R_a$ ) becomes a measure of the solubility.  $R_a$  for chemical species 1 and 2, is obtained with an empirical factor “4” for  $\delta_D$ .

$$R_a^2 = 4(\delta_{D,1} - \delta_{D,2})^2 + (\delta_{P,1} - \delta_{P,2})^2 + (\delta_{H,1} - \delta_{H,2})^2 \quad (1)$$

The result to the species 1 and 2 is interpreted as the shorter  $R_a$ , the better affinity.

The location of a “good” gelator in HSP space, however, should neither be so closed to that of a solvent, nor be so far; an appropriate  $R_a$  is required. Previous works<sup>5, 6</sup> say that a single gelator should not be *perfectly* dissolved into the solvent. In our present systems with binary gelators, however, each gelator is *dissolved* into the solvent under an appropriate solvent choice. We indeed need detailed handling of the HSPs and Hansen space with using another manner that is employed for single gelator systems.

## §S2. Materials and thermal measurements

### *2–1. Materials*

Each gelator of  $0.10 \text{ mol dm}^{-3}$  was dissolved in an organic solvent. Their equivolume solutions of each gelator were mixed carefully to have a gel immediately. The mixture was heated up to  $80^\circ\text{C}$  to obtain a sol state using a dry bath, and the sol system was stirred. The sample was then cooled down to room temperature by air to reobtain a gel state. Such a heating up—cooling down process was repeated for at least three times, and we got an isotropic gel.

We purchased 23 nonpolar (see Tables SA1 and SA2) and 7 polar (Table SA2) organic solvents in this study from FUJIFILM Wako, TCI, or Kanto. The gelators, or *p*-chlorophenol and AOT, were brought from FUJIFILM Wako and TCI, respectively. The chemicals but for AOT were used as received. Otherwise, AOT was dried in an oven at  $80^\circ\text{C}$  for 3 d before use to remove any trace water.

**Table S1.  $T_{\text{drop}}$  values of organogels depending on solvent<sup>(1)</sup>**

| No. | Solvent groups                    | Solvents                     | $T_{\text{drop}} / ^\circ\text{C}^{(2)}$ | $\sigma / ^\circ\text{C}^{(3)}$ | $T_{\text{b, solv}} / ^\circ\text{C}^{(4)}$ |
|-----|-----------------------------------|------------------------------|------------------------------------------|---------------------------------|---------------------------------------------|
| 1   | I aromatics                       | benzene                      | 24.8                                     | 3.0                             | 80.1                                        |
| 2   |                                   | butylbenzene                 | 34.0                                     | 4.2                             | 134.22                                      |
| 3   |                                   | toluene                      | 25.2                                     | 2.5                             | 110.6                                       |
| 4   |                                   | 4- <i>tert</i> -butyltoluene | 39.4                                     | 4.7                             | 193                                         |
| 5   |                                   | <i>o</i> -xylene             | 28.2                                     | 2.3                             | 144.4                                       |
| 6   |                                   | <i>m</i> -xylene             | 30.8                                     | 3.6                             | 139.3                                       |
| 7   |                                   | <i>p</i> -xylene             | 26.7                                     | 4.2                             | 138.35                                      |
| 8   |                                   | mesitylene                   | 29.2                                     | 4.1                             | 164.7                                       |
| 9   | II acyclic alkanes (hydrocarbons) | hexane                       | 60.9                                     | 3.2                             | 68.7                                        |
| 10  |                                   | heptane                      | 60.1                                     | 3.5                             | 98                                          |
| 11  |                                   | decane                       | 65.9                                     | 2.1                             | 174.1                                       |
| 12  |                                   | undecane                     | 67.6                                     | 2.6                             | 195.9                                       |
| 13  |                                   | 2,2,4-trimethylpentane       | 57.1                                     | 3.6                             | 99.238                                      |
| 14  | III acyclic alkane (other)        | carbon tetrachloride         | 26.3                                     | 0.5                             | 76.8                                        |
| 15  | IV cyclic alkanes                 | cyclopentane                 | 43.2                                     | 3.0                             | 49.2                                        |
| 16  |                                   | cyclohexane                  | 48.2                                     | 1.4                             | 80.7                                        |
| 17  |                                   | methylcyclohexane            | 43.6                                     | 1.4                             | 100.9                                       |
| 18  |                                   | ethylcyclohexane             | 50.0                                     | 1.7                             | 131.9                                       |
| 19  |                                   | cycloheptane                 | 47.4                                     | 2.6                             | 118.48                                      |
| 20  | V acyclic alkene                  | 2-ethyl-1-butene             | 36.4                                     | 1.7                             | 64.7                                        |
| 21  | VI cyclic alkanes                 | cyclopentene                 | 28.0                                     | 2.2                             | 44.2                                        |
| 22  |                                   | cyclohexene                  | 30.2                                     | 2.7                             | 83                                          |
| 23  |                                   | cyclooctene                  | 32.2                                     | 1.7                             | 85.5                                        |

<sup>(1)</sup> Solvents that gel the gelators (AOT and *p*-chlorophenol) are written down in the Table.

<sup>(2)</sup> Obtained in this study.

<sup>(3)</sup> Standard deviation of  $T_{\text{drop}}$ .

<sup>(4)</sup> Boiling point of solvent. Taken from SciFinder<sup>n</sup>: <https://scifinder-n.cas.org/>

**Table S2. Hansen solubility parameters of solvents and gelator**

| No.                    | Solvent group            | Solvent / Gelator            | $\delta D /$<br>(MP) <sup>1/2</sup> | $\delta P /$<br>(MP) <sup>1/2</sup> | $\delta H$<br>(MP) <sup>1/2</sup> / |
|------------------------|--------------------------|------------------------------|-------------------------------------|-------------------------------------|-------------------------------------|
| Gelled solvents        |                          |                              |                                     |                                     |                                     |
| 1                      | I aromatics              | benzene                      | 18.4                                | 0.0                                 | 2.0                                 |
| 2                      |                          | butylbenzene                 | 17.4                                | 0.1                                 | 1.1                                 |
| 3                      |                          | toluene                      | 18.1                                | 1.4                                 | 2.0                                 |
| 4                      |                          | 4- <i>tert</i> -butyltoluene | 16.9                                | 1.7                                 | 2.0                                 |
| 5                      |                          | <i>o</i> -xylene             | 17.8                                | 1.0                                 | 3.1                                 |
| 6                      |                          | <i>m</i> -xylene             | 18.0                                | 2.3                                 | 2.3                                 |
| 7                      |                          | <i>p</i> -xylene             | 18.0                                | 1.0                                 | 3.1                                 |
| 8                      |                          | mesitylene                   | 18.0                                | 0.6                                 | 0.6                                 |
| 9                      | II acyclic alkanes       | hexane                       | 14.9                                | 0.0                                 | 0.0                                 |
| 10                     |                          | heptane                      | 15.3                                | 0.0                                 | 0.0                                 |
| 11                     |                          | decane                       | 15.7                                | 0.0                                 | 0.0                                 |
| 12                     |                          | undecane                     | 16.0                                | 0.0                                 | 0.0                                 |
| 13                     |                          | 2,2,4-trimethylpentane       | 14.1                                | 0.0                                 | 0.0                                 |
| 14                     | III perhaloalkane        | carbon tetrachloride         | 17.8                                | 0.0                                 | 0.6                                 |
| 15                     | IV cyclic alkanes        | cyclopentane                 | 16.4                                | 0.0                                 | 1.8                                 |
| 16                     |                          | cyclohexane                  | 16.8                                | 0.0                                 | 0.2                                 |
| 17                     |                          | methylcyclohexane            | 16.0                                | 0.0                                 | 1.0                                 |
| 18                     |                          | ethylcyclohexane             | 16.2                                | 0.1                                 | 0.1                                 |
| 19                     |                          | cycloheptane                 | 17.1                                | 1.4                                 | 1.9                                 |
| 20                     | V acyclic alkene         | 2-ethyl-1-butene             | 14.9                                | 1.7                                 | 3.5                                 |
| 21                     | VI cyclic alkenes        | cyclopentene                 | 16.7                                | 3.8                                 | 1.7                                 |
| 22                     |                          | cyclohexene                  | 17.2                                | 1.0                                 | 2.0                                 |
| 23                     |                          | cyclooctene                  | 16.9                                | 2.1                                 | 3.5                                 |
| “Sol” solvents         |                          |                              |                                     |                                     |                                     |
| 31                     | VII polar <sup>(1)</sup> | acetonitrile                 | 5.3                                 | 18.0                                | 6.1                                 |
| 32                     |                          | cyclopentanone               | 17.9                                | 11.9                                | 5.2                                 |
| 33                     |                          | cyclohexanol                 | 17.4                                | 4.1                                 | 13.5                                |
| 34                     |                          | cyclohexanone                | 17.8                                | 8.4                                 | 5.1                                 |
| 35                     |                          | chlorocyclohexane            | 17.3                                | 5.5                                 | 2.0                                 |
| 36                     |                          | diethyl ether                | 14.5                                | 2.9                                 | 4.6                                 |
| 37                     |                          | ethanol                      | 15.8                                | 8.8                                 | 19.4                                |
| Gelator <sup>(2)</sup> |                          |                              |                                     |                                     |                                     |

|           |      |                    |      |      |      |
|-----------|------|--------------------|------|------|------|
| <b>41</b> | VIII | AOT                | 16.8 | 7.5  | 10.4 |
| <b>42</b> |      | sulfosuccinic acid | 18.7 | 18.2 | 31.2 |
| <b>43</b> |      | 3-methylheptane    | 15.2 | 0.1  | 0.1  |

<sup>(1)</sup> Solvents in which organogels are not formed are tagged as “polar” solvents. Details of chemical groups are omitted.

<sup>(2)</sup> Including the gelator (AOT; No. 41) and the moieties of AOT (Nos. 42 and 42).

## 2–2. Thermal measurements

### $T_{\text{drop}}$ measurements

We employed a Mettler-Toledo DP 70 Drop Point system for  $T_{\text{drop}}$  measurements. The gel sample was placed in a cylindrical cup with a volume of approximately  $0.6 \text{ cm}^3$ , and in the bottom of the cup there is a hole with a diameter 2.8 mm. System temperature was raised with a rate  $1.0 \text{ }^\circ\text{C min}^{-1}$ , which gives rise to liquefy the gel sample. The liquified sample drops off from the hole, which is analyzed to obtain the drop point dataset. Measurements were performed at least 6 times for a gel, and an average was taken to determine  $T_{\text{drop}}$  with an accuracy of  $\pm 1.5 \text{ }^\circ\text{C}$ , typically.

### DTA

We use a home-built calorimeter for the differential thermal analysis (DTA). We monitor the temperature difference between the sample and reference by using a chromel-constantan thermocouple. In our measurements, the thermo-electro motive force was monitored by means of a nanovoltmeter (Keithley 2182A), where temperature was administrated with a temperature controller (Chino KP1000). When heating the system, we raised temperature with a rate of  $3 \text{ K min}^{-1}$  using a controller. Otherwise, the cooling process was conducted by air.

In the measurements,  $1 \text{ cm}^3$  of the sample gel was loaded into a glass tube having a diameter of 8 mm. We froze the sample tube at the liquid nitrogen temperature, and enclosed the system by glasswork under an atmosphere of an inert gas: helium.

Figs. S1a–b demonstrate equipment and diagrams of  $T_{\text{drop}}$  and DTA measurements.

(a)

a1

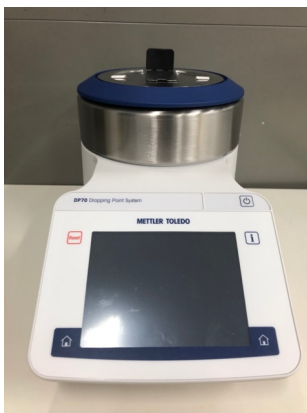

a2

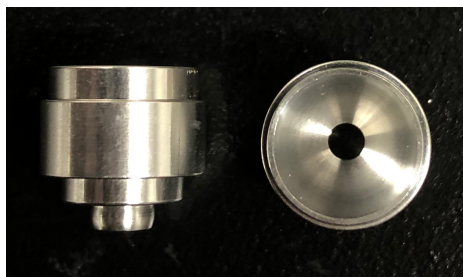

a3

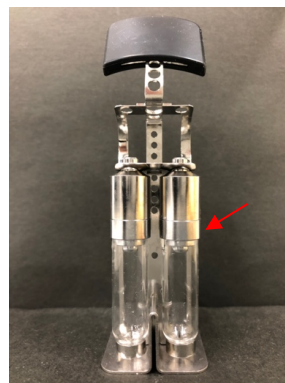

**Fig. S1a.** Pictures of Mettler-Toledo DP 70 Drop Point system for  $T_{\text{drop}}$  measurements. (a1) System overview. (a2) A sample cup, where a hole is made in the bottom. Left: side view, right: top view. (a3) An adapter to hold the sample cup. The red arrow indicates the position where the cup is placed.

(b)

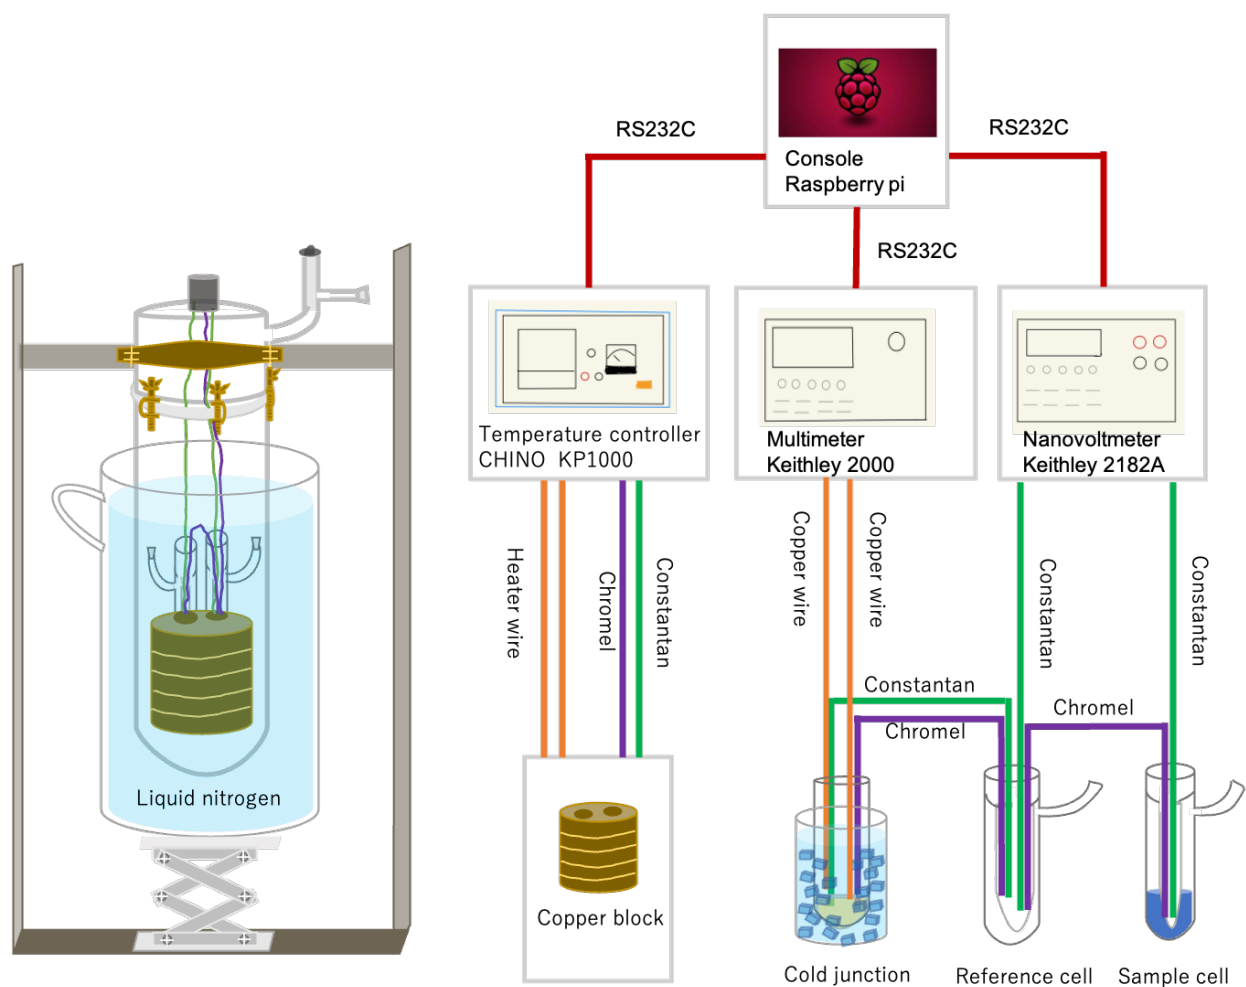

**Fig. S1b.** Schematic diagram for home-built DTA equipment we used in this study. Left: Aa schematic image of the external view of the DTA apparatus. Right: a schematic diagram of the inter-instrument connections.

### §S3. Data analyses with HSPs

A package of Hansen solubility parameters were purchased from their website<sup>7</sup> and we use the version 5.0.03 package. Some of Hansen solubility parameters for gelators and solvents are already preset in the package. If we cannot find the parameter for a substance, we input a molecular structure using SMILES (simplified molecular input line entry system) into the package to obtain the adequate parameters. We acquire a dataset ( $2\delta D$ ,  $\delta H$ ,  $\delta P$ ) for a substance from the software, being processed for further analyses.

We note that all the parameters ( $2\delta D$ ,  $\delta H$ ,  $\delta P$ ) particularly for gelators were obtained from the SMILES input. In the present study, we employ the parameters as given from the software package.

#### §S4. *k*-Fold cross validation for plots in Analyses I–V

##### *4–1. Procedure*

In this subsection we further analyze the plots in Analyses I–V (Fig. 1), using *k*-fold cross validation.<sup>8</sup> This detailed analysis ensures applicability of the linear fitting drawn in Fig. 1.

We use the algorithm of cross validation as follows. From the  $R_a$ — $T_{\text{drop}}$  data-sets, we randomly remove a solvent from each solvent group: aromatics, acyclic alkanes, cyclic alkanes, cyclic alkenes. Eventually, data-sets with 4 solvents are removed. As we used 23 solvents totally, 19 solvents are left for further analysis. The correlation of the  $R_a$ — $T_{\text{drop}}$  data-sets in 19 solvents are fit linearly, and the slope and intercept of the line are determined.

We iterated this procedure for 5 times (5-fold), and obtained an averaged value of the slope and intercept. The averaged value is then compared with the "original" fitting result using the all 23 solvents.

## 4-2. Results

**Table S3. Solvent choices for 5-Fold cross validation for linear fitting drawn in Fig. 1**

| No. | Solvent groups |                                | Solvents                            | Run <sup>(1)</sup> |   |   |   |   |
|-----|----------------|--------------------------------|-------------------------------------|--------------------|---|---|---|---|
|     |                |                                |                                     | 1                  | 2 | 3 | 4 | 5 |
| 1   | I              | aromatics                      | benzene                             | 1                  | 1 | 0 | 1 | 0 |
| 2   |                |                                | butylbenzene                        | 1                  | 1 | 1 | 1 | 1 |
| 3   |                |                                | toluene                             | 1                  | 0 | 1 | 1 | 1 |
| 4   |                |                                | 4- <i>tert</i> -butyltoluene        | 1                  | 1 | 1 | 1 | 1 |
| 5   |                |                                | <i>o</i> -xylene                    | 0                  | 1 | 1 | 1 | 1 |
| 6   |                |                                | <i>m</i> -xylene                    | 1                  | 1 | 1 | 0 | 1 |
| 7   |                |                                | <i>p</i> -xylene                    | 1                  | 1 | 1 | 1 | 1 |
| 8   |                |                                | mesitylene                          | 1                  | 1 | 1 | 1 | 1 |
| 9   | II             | acyclic alkanes (hydrocarbons) | hexane                              | 1                  | 1 | 0 | 1 | 1 |
| 10  |                |                                | heptane                             | 1                  | 1 | 1 | 1 | 1 |
| 11  |                |                                | decane                              | 1                  | 0 | 1 | 1 | 1 |
| 12  |                |                                | undecane                            | 0                  | 1 | 1 | 1 | 0 |
| 13  |                |                                | 2,2,4-trimethylpentane              | 1                  | 1 | 1 | 0 | 1 |
| 14  | III            | perhaloalkane                  | carbon tetrachloride <sup>(2)</sup> | 1                  | 1 | 1 | 1 | 1 |
| 15  | IV             | cyclic alkanes                 | cyclopentane                        | 1                  | 1 | 1 | 1 | 1 |
| 16  |                |                                | cyclohexane                         | 1                  | 0 | 1 | 1 | 1 |
| 17  |                |                                | methylcyclohexane                   | 1                  | 1 | 1 | 0 | 0 |
| 18  |                |                                | ethylcyclohexane                    | 1                  | 1 | 0 | 1 | 1 |
| 19  |                |                                | cycloheptane                        | 0                  | 1 | 1 | 1 | 1 |
| 20  | V              | acyclic alkene                 | 2-ethyl-1-butene <sup>(2)</sup>     | 1                  | 1 | 1 | 1 | 1 |
| 21  | VI             | cyclic alkanes                 | cyclopentene                        | 1                  | 0 | 1 | 1 | 1 |
| 22  |                |                                | cyclohexene                         | 1                  | 1 | 1 | 0 | 0 |
| 23  |                |                                | cyclooctene                         | 0                  | 1 | 0 | 1 | 1 |

<sup>(1)</sup> In each run, a solvent is removed from solvent groups I, II, IV, and VI. Tags “0” and “1” are the solvent “removed” and “used” for analysis, respectively. The “0” solvents were chosen with a random number generator.

<sup>(2)</sup> Solvents which are always used for analysis, because a single solvent is in the groups III and V.

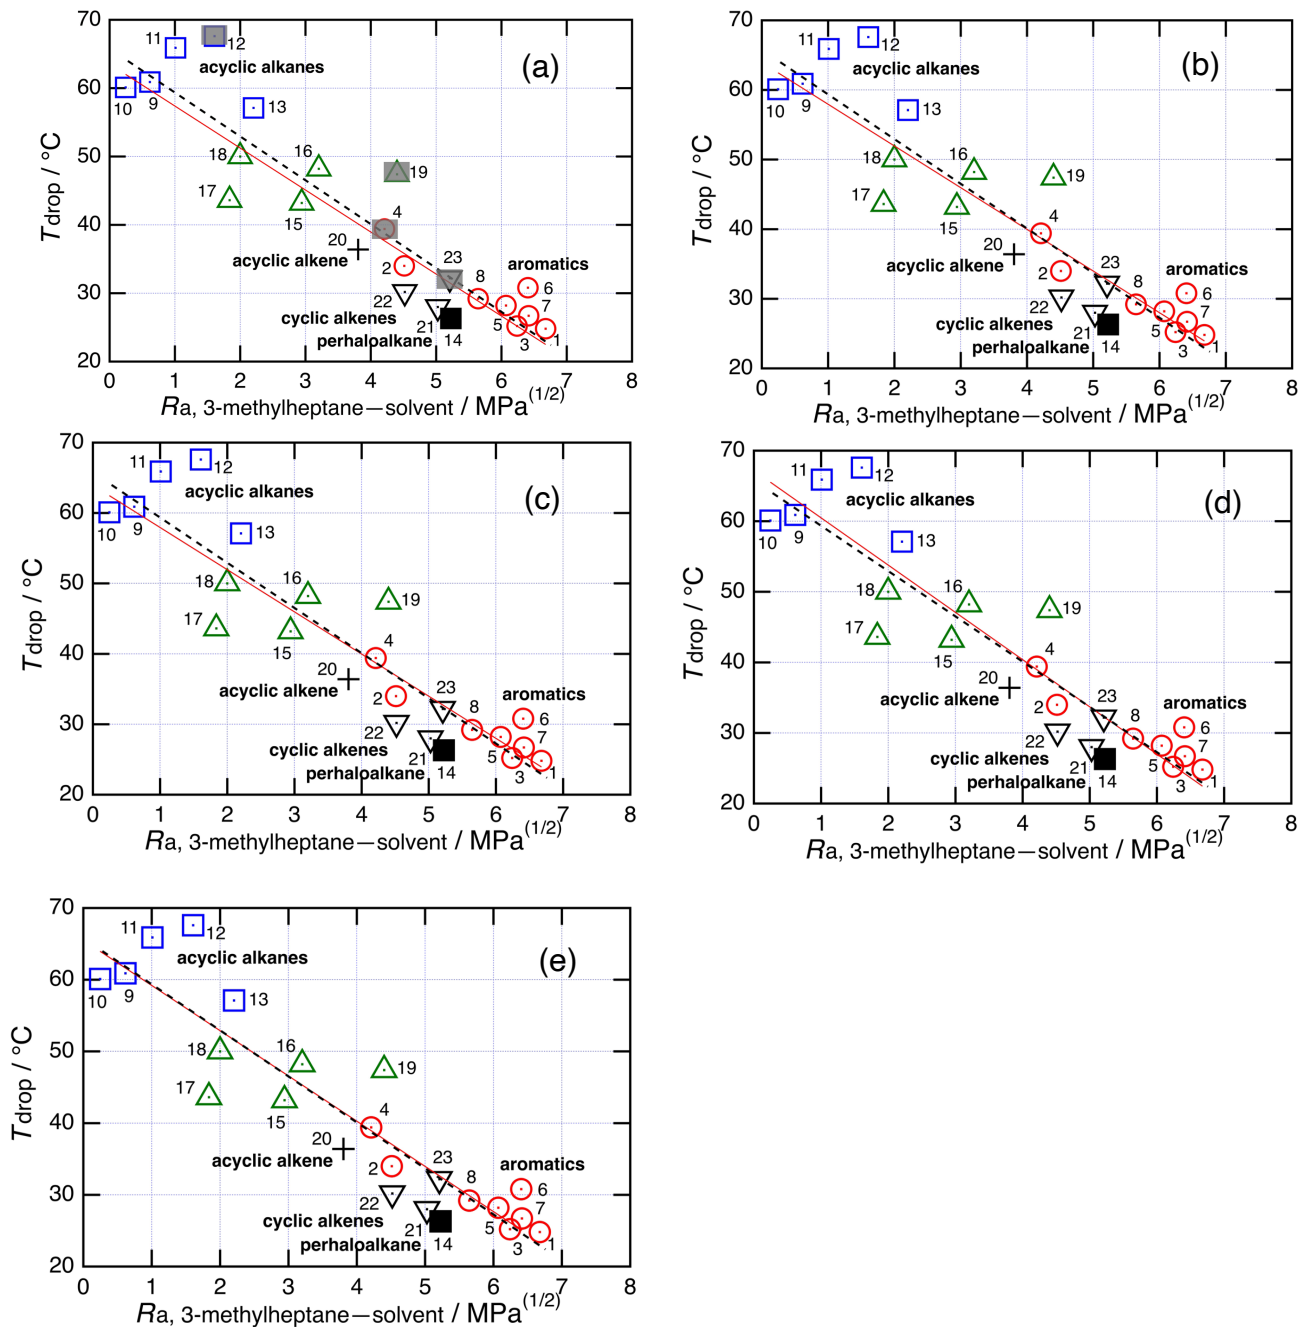

**Fig. S2.** Results for 5-fold cross validation for the  $T_{\text{drop}}-R_a$  relation. The black dotted line stands for the fitting line where all the data-sets is employed. Panels a-e mean runs 1-5, respectively, in this analysis. In Panel a, as guide to eye, 4 data sets which were *not* employed for fitting (“0” solvents in Table S3) are shaded by gray color. The new fitting line after the solvent removal is shown in red. The detailed solvent data-sets in Panels b-e are shown in Table S3.

§S5. Schematic diagram of organogel breakdown with increasing temperature

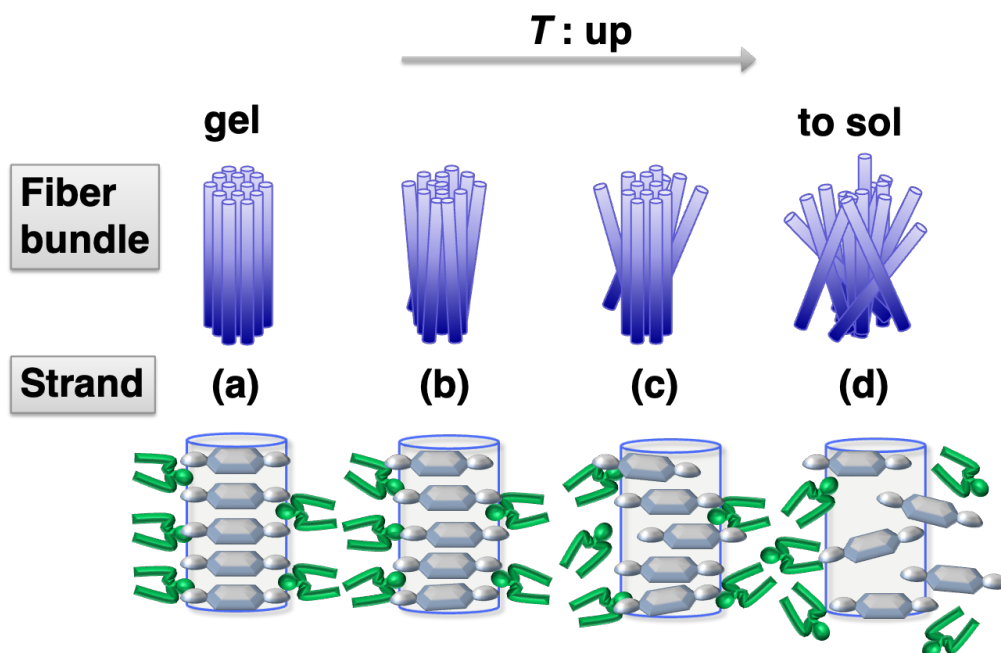

**Fig. S3.** A schematic diagram of gel–sol transition with heat, suggested by  $T_{\text{drop}}$  and DTA measurements. See Table S3 for details of States a–d. A part of the mechanisms above are found in the previous study.<sup>9</sup>

**Table S4.** Details of Phases a–d proposed in Fig. S2

| State | $T / ^\circ\text{C}^{(1)}$ | Measurements<br>where applicable | Details                                                                                                                                   |
|-------|----------------------------|----------------------------------|-------------------------------------------------------------------------------------------------------------------------------------------|
| a     | Room temperature           | —                                | Gel state. The strand and fiber bundle are well organized                                                                                 |
| b     | 54.3                       | DTA                              | Some exterior of the fiber bundles peels off. But $T_{\text{drop}}$ cannot be sensed as they have a sufficient organized strand structure |
| c     | 57.1                       | $T_{\text{drop}}$                | $T_{\text{drop}}$ is sensed with a more destroyed fiber bundle, but still some memories are in the strand                                 |
| d     | 64.0                       | DTA                              | Toward sol state. Both of the fiber bundle and strand completely collapse above this temperature                                          |

<sup>(1)</sup>For organogel in 2,2,4-trimethylpentane, as a typical.

## References in Electronic Supplementary Information

1. C. M. Hansen, *Progress in Organic Coatings*, 2004, **51**, 77–84.
2. C. M. Hansen, *Hansen Solubility Parameters*, CRC Press, Boca Raton, Second edn., 2007.
3. J. H. Hildebrand and R. L. Scott, *The solubility of nonelectrolytes*, Reinhold New York, 1950.
4. J. H. Hildebrand and R. L. Scott, *Regular solutions*, Prentice-Hall, Englewood Cliffs, NJ, 1962.
5. M. Raynal and L. Bouteiller, *Chem Commun (Camb)*, 2011, **47**, 8271–8273.
6. D. Rosa Nunes, M. Raynal, B. Isare, P.-A. Albouy and L. Bouteiller, *Soft Matter*, 2018, **14**, 4805–4809.
7. S. J. Abbott, C. M. Hansen and H. Yamamoto, Hansen Solubility Parameters, <https://www.hansen-solubility.com/>).
8. S. M. Pirayonesi and T. E. El-Diraby, *J. Infrastruct. Syst.*, 2020, **26**, 04019036(04019023 pages).
9. S. Katsube, M. Kinoshita, K. Amano, T. Sato, Y. Katsumoto, T. Umecky, T. Takamuku, T. Kaji, M. Hiramoto, Y. Tsurunaga and K. Nishiyama, *Langmuir*, 2016, **32**, 4352–4360.
